# Supplementary material for: A crossover pilot study evaluating the functional outcomes of two different types of robotic movement training in chronic stroke survivors using the arm exoskeleton BONES
Source: Springer Nature journal article supplement (doi:10.1186/1743-0003-10-112), 2013-01-01
Supplement: 12984_2013_531_MOESM4_ESM.pdf [file 12984_2013_531_MOESM4_ESM.pdf]

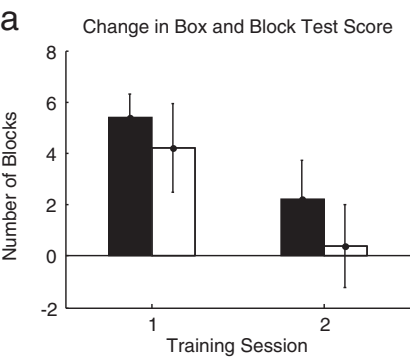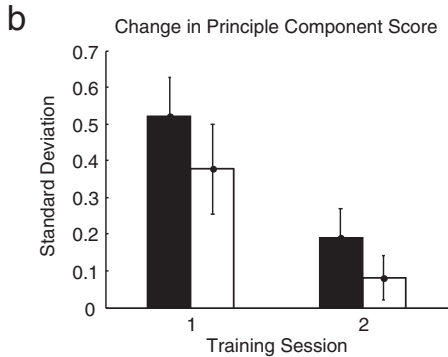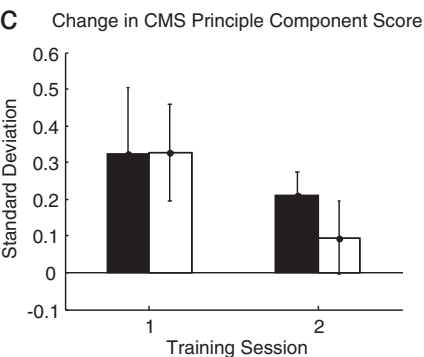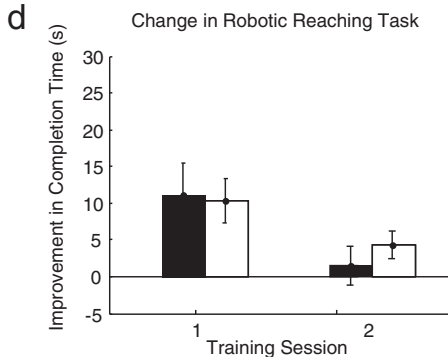

□ Multijoint functional robotic training first group

■ Single joint robotic training first group
